# Supplementary material for: Enhanced performance of supercapacitors by constructing a “mini parallel-plate capacitor” in an electrode with high dielectric constant materials
Source: Royal Society of Chemistry journal article supplement (doi:10.1039/d0ta04364h), 2020-01-01
Supplement: d0ta04364h1.pdf [file d0ta04364h1.pdf]

# Enhancing the Performance of Supercapacitors through Constructing “Mini Parallel-Plate Capacitor” in Electrode with High Dielectric Constant Materials

Huayao Tu,<sup>a</sup> Shouzhi Wang,<sup>a</sup> Hehe Jiang,<sup>a</sup> Zhenyan Liang,<sup>a</sup> Dong Shi,<sup>a</sup> Yongliang Shao,<sup>a,b</sup> Jianxing Shen,<sup>b</sup> Yongzhong Wu<sup>\*a,b</sup> and Xiaopeng Hao<sup>\*a,b</sup>

<sup>a</sup> State Key Lab of Crystal Materials, Shandong University, Jinan, 250100, P.R. China

<sup>b</sup> Department of Materials Science and Engineering, Qilu University of Technology, Jinan, 250353, P. R. China.

\*E-mail: wuyz@sdu.edu.cn; xphao@sdu.edu.cn

## S1. Chemicals

FeCl<sub>3</sub> · 6H<sub>2</sub>O, V<sub>2</sub>O<sub>5</sub>, SnCl<sub>4</sub> · 5H<sub>2</sub>O, tetrabutyl titanate (TBT), Urea, SDS, CTAB, HCl, ethylene glycol (EG), KOH, H<sub>2</sub>O<sub>2</sub>, NaBr, H<sub>2</sub>C<sub>2</sub>O<sub>4</sub> and ethanol were purchased from Sinopharm Chemical Reagent Co., Ltd. (Shanghai). All those reagents were analytical grade. NH<sub>3</sub>, N<sub>2</sub> purchased from Deyang special Gas Co., Ltd. (Jinan, China).

## S2. Synthetic Methods

**Preparation of acid treated carbon fiber:** In a typical procedure, a piece of carbon fiber cloth (1.5 cm × 4cm) was subsequently cleaned with DI water and ethanol under ultrasonic, and dried in an oven. Then, the freshly cleaned CF was added into a stainless-steel autoclave (100mL) containing commercially available concentrated HNO<sub>3</sub> (50 mL) and DI water (15 mL), and was hold at 120 °C for 12 h. Then, the resulted CF was washed thoroughly with DI water until the pH is close to 7.

**Synthesis of  $\text{FeO}_x\text{N}_y$  nanorods:** a Teflonlined stainless-steel autoclave with a capacity of 50 mL was filled with 30 mL of an aqueous solution containing 0.4 g ferric chloride ( $\text{FeCl}_3 \cdot 6\text{H}_2\text{O}$ ), 0.2 g urea, and 0.02 g sodium lauryl sulfate (SDS). A 1.5 cm  $\times$  4 cm piece of clean carbon fiber treated with air plasma was immersed in the precursor solution in an autoclave. The autoclave was heated at 100 °C for 12 h and then cooled to room temperature. Hydroxides grown on the carbon fiber were washed with deionized water and ethanol and dried at 60 °C in air. The asprepared  $\text{FeOOH}$  samples were further thermally annealed at 350 °C under  $\text{NH}_3$  atmosphere for 2 h at the heating rate of 2 °C min<sup>-1</sup>. For comparison, the  $\text{Fe}_2\text{O}_3$  samples was obtained by annealed at 350 °C under nitrogen ( $\text{N}_2$ ) atmosphere for 2 h. Powder samples of  $\text{Fe}_2\text{O}_3$  were prepared by the same method.

**Synthesis of  $\text{VO}_x\text{N}_y$  nanorods:** first, 0.9 g of  $\text{V}_2\text{O}_5$  powder and 1.35 g of  $\text{H}_2\text{C}_2\text{O}_4$  powder were dissolved with 30 mL of distilled water at 75 °C for 12h. 10 ml of the above solution was transferred into a 50 mL Teflon lined stainless steel autoclave. Then 1 mL of 30%  $\text{H}_2\text{O}_2$  and 20 mL of ethanol were added and kept continuously stirring for about 30 min; then, one piece of acid treated clean carbon fiber (1.5 cm  $\times$  4 cm) was immersed into the reaction solution. The autoclave liners were kept at 180 °C for 3 h and then the sample was collected and rinsed with ethanol and distilled water. The obtained hydroxide array growth on the carbon cloth was washed with deionized (DI) water, ethanol and dried at 60 °C. Following the as-prepared samples were further thermally annealed at 550 °C under ammonia ( $\text{NH}_3$ ) atmosphere for 1 h with the heating rate of 3°C min<sup>-1</sup>, during the heating and cooling process use  $\text{N}_2$  atmosphere protection.

For comparison, the VO<sub>2</sub> samples was obtained by annealed at 550°C under nitrogen (N<sub>2</sub>) atmosphere for 2 h. Powder samples of VO<sub>2</sub> were prepared by the same method.

**Synthesis of SnO<sub>x</sub>N<sub>y</sub> nanorods:** first, 0.927 g of NaBr powder were dissolved with 3 mL of distilled water in beaker A and stirred 0.5 hour. Identically, 0.1 g of SnCl<sub>4</sub>·5H<sub>2</sub>O were dissolved with 20 mL of glacial acetic acid in beaker B and stirred 0.5 hour. Then, the solution in beaker A and beaker B was mixed and stirred for 0.5 hour to form mixed solution. After that, the above solution was transferred into a 50 mL Teflon lined stainless steel autoclave and 3 mL of ethanol (Et) were added and kept continuously stirring for about 0.5 hour; then, one piece of acid treated clean carbon fiber (1.5 cm × 4 cm) was immersed into the reaction solution. The autoclave liners was kept at 200 °C for 24 h and then the obtained hydroxide array growth on the carbon fiber was washed with deionized (DI) water, ethanol and dried at 60°C. Following the as-prepared samples were further thermally annealed at 475°C under ammonia (NH<sub>3</sub>) atmosphere for 4 h with the heating rate of 3 °C min<sup>-1</sup>, during the heating and cooling process use N<sub>2</sub> atmosphere protection. For comparison, the SnO<sub>2</sub> samples was obtained by annealed at 475 °C under nitrogen (N<sub>2</sub>) atmosphere for 4 h. Powder samples of SnO<sub>2</sub> were prepared by the same method.

### **S3. Materials Characterization**

The morphology and phase structure of the samples were investigated with FESEM (Hitachi-4800), HRTEM (JEM 2100F), XRD (Bruker D8 Advance), XPS (Philips Tecnai Twin-20U), and Raman (Horiba Jobin Yvon), respectively.

## S4. Electrochemical Tests

The electrochemical characterizations of the CM and the CMM were tested using a three-electrode system on a CHI660E electrochemical workstation (Shanghai Chen Hua Instruments Co., China). In the test system, the self-supported binder-free CM and CMM were used as the work electrode, with a platinum sheet (2 cm × 2 cm) as a counter electrode and Hg/HgO as a reference electrode, in 6.0 M KOH aqueous solution.

All the electrochemical measurements with galvanostatic charge/discharge (GCD), cyclic voltammetry (CV), and electrochemical impedance spectroscopy (EIS) techniques were conducted in three-electrode system. For detail, CV and GCD curves were collected at −1 V to 0 V against Hg/HgO by varying the scan rate from 5 mV s<sup>−1</sup> to 100 mV s<sup>−1</sup> and current density from 0.1 A g<sup>−1</sup> to 10 A g<sup>−1</sup>, respectively. Alternating current EIS spectra were collected within a frequency range of 10<sup>−2</sup> Hz – 10<sup>5</sup> Hz at the open circuit voltage with AC amplitude of 5 mV.

For three-electrode cells, specific capacity derived from GCD discharge curves was calculated as:

$$C(F/g) = I \int (1/V(t))dt$$

where I is the applied constant-current density, t is the discharge time, and V(t) is the potential as a function of t.

Dielectric constant test of metal oxide materials: The metal oxide powder of the corresponding crystal type and morphology is pressed into a small wafer with an area of 1.37 mm<sup>2</sup> and a certain thickness (0.75~1.37 mm) by a tablet press, and its capacitance and dielectric loss are measured by Impedance analyzer (Agilent-4294A).

Then, the dielectric constant of the metal oxide is obtained from the measured capacitance.

## S5. Supplementary Figures S1–S19

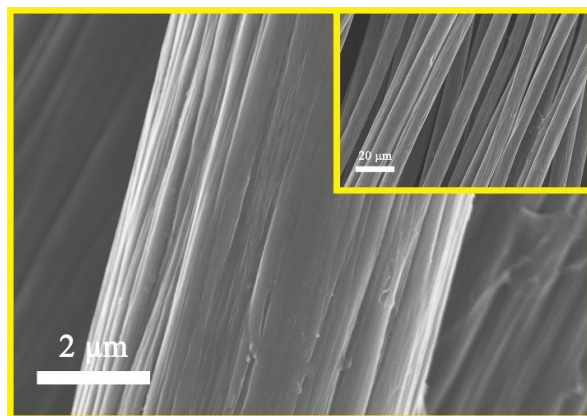

**Figure S1.** SEM image of acid treated clean carbon fiber.

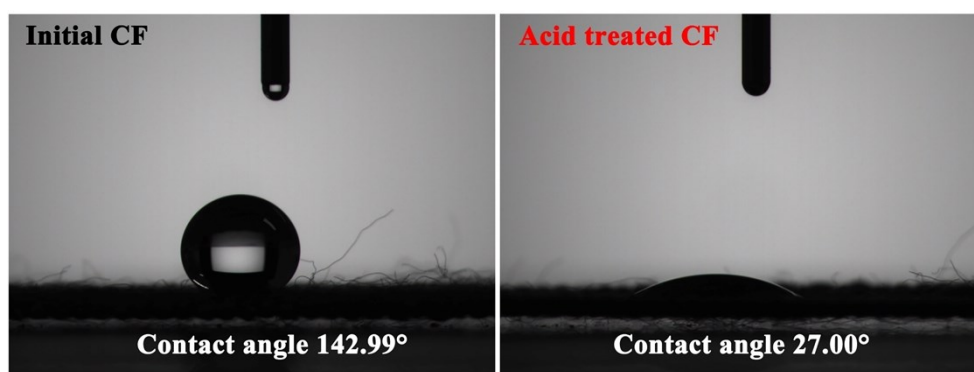

**Figure S2.** Water contact angles of CF and acid treated clean CF.

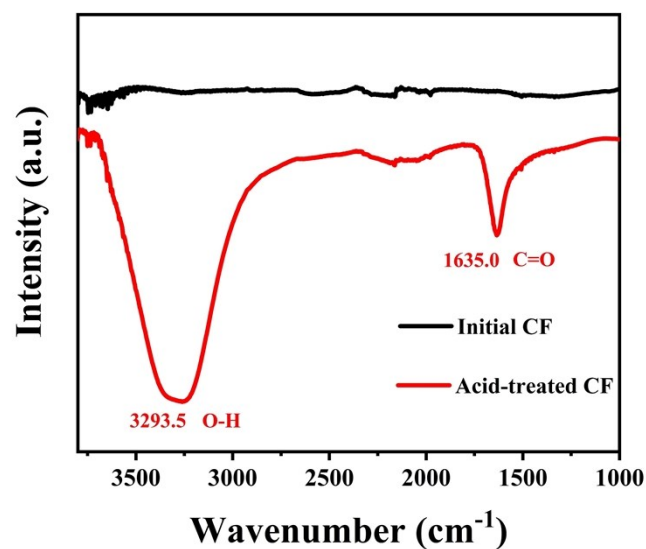

**Figure S3.** Fourier transform infrared spectroscopy (FTIR) spectra of CF and acid treated clean CF.

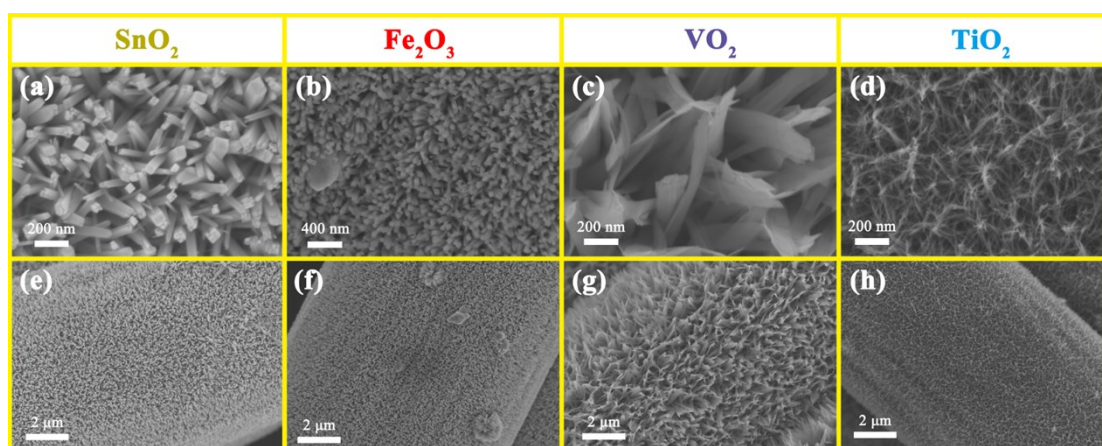

**Figure S4.** SEM images of the corresponding (a, e)  $\text{SnO}_2$ , (b, f)  $\text{Fe}_2\text{O}_3$ , (c, g)  $\text{VO}_2$  and  $\text{TiO}_2$  (d, h) hydroxide precursors used for preparing metal oxynitride nanorods at different magnification.

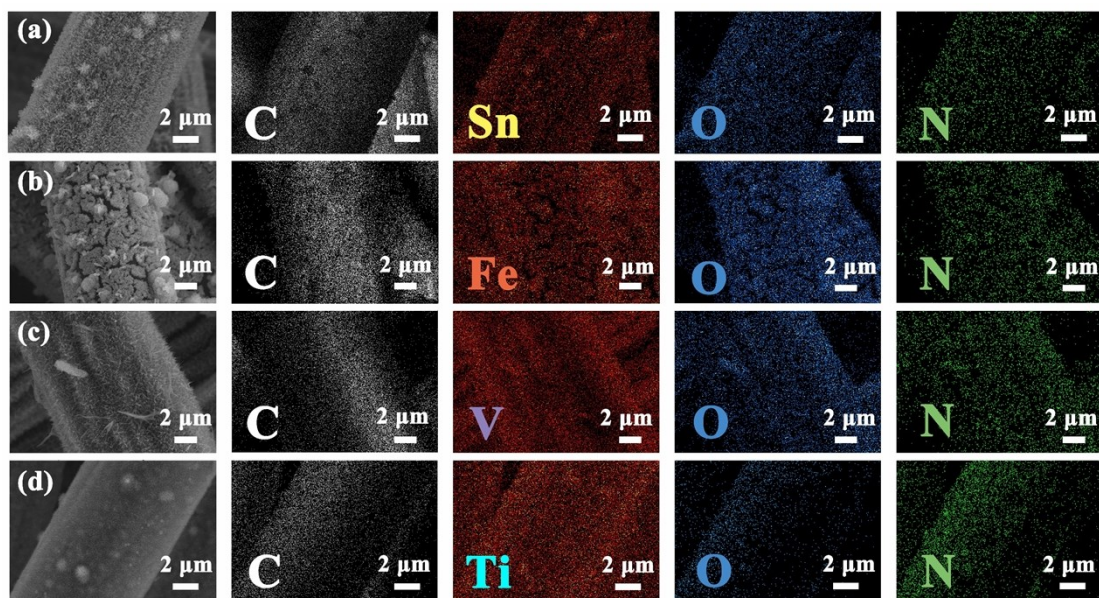

**Figure S5.** Elemental mapping images of the as-prepared  $\text{SnO}_x\text{N}_y$  (a),  $\text{FeO}_x\text{N}_y$  (b),  $\text{VO}_x\text{N}_y$  (c) and  $\text{TiO}_x\text{N}_y$  (d) samples.

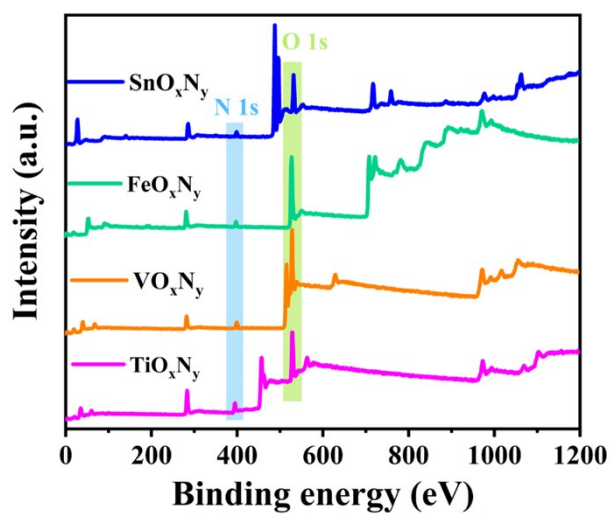

**Figure S6.** The XPS spectra of survey spectra.

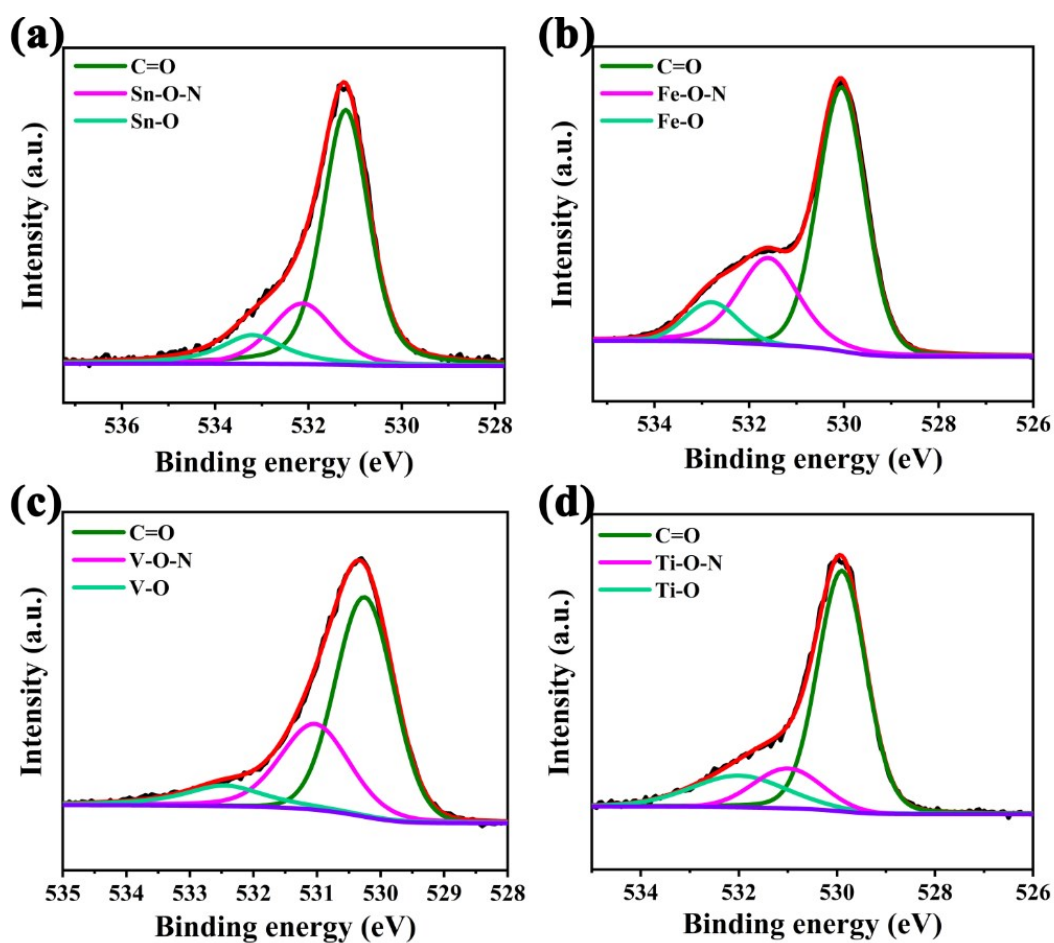

**Figure S7.** Corresponding high-resolution O 1s spectra of  $\text{SnO}_x\text{N}_y$  (a),  $\text{FeO}_x\text{N}_y$  (b),  $\text{VO}_x\text{N}_y$  (c) and  $\text{TiO}_x\text{N}_y$  (d), respectively.

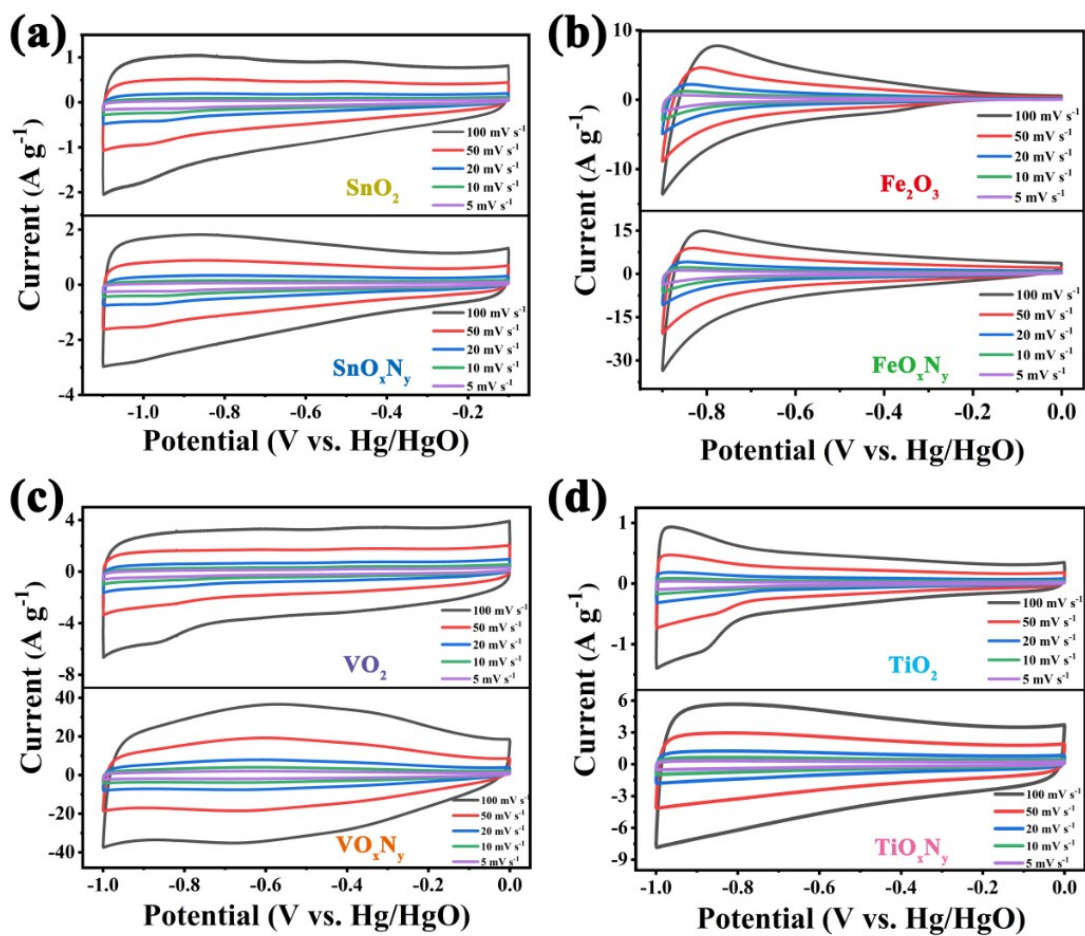

**Figure S8.** The CV curves at increasing scan rates of the SnO<sub>2</sub> and SnO<sub>x</sub>N<sub>y</sub> (a), Fe<sub>2</sub>O<sub>3</sub> and FeO<sub>x</sub>N<sub>y</sub> (b), VO<sub>2</sub> and VO<sub>x</sub>N<sub>y</sub> (c), TiO<sub>2</sub> and TiO<sub>x</sub>N<sub>y</sub> (d) electrodes.

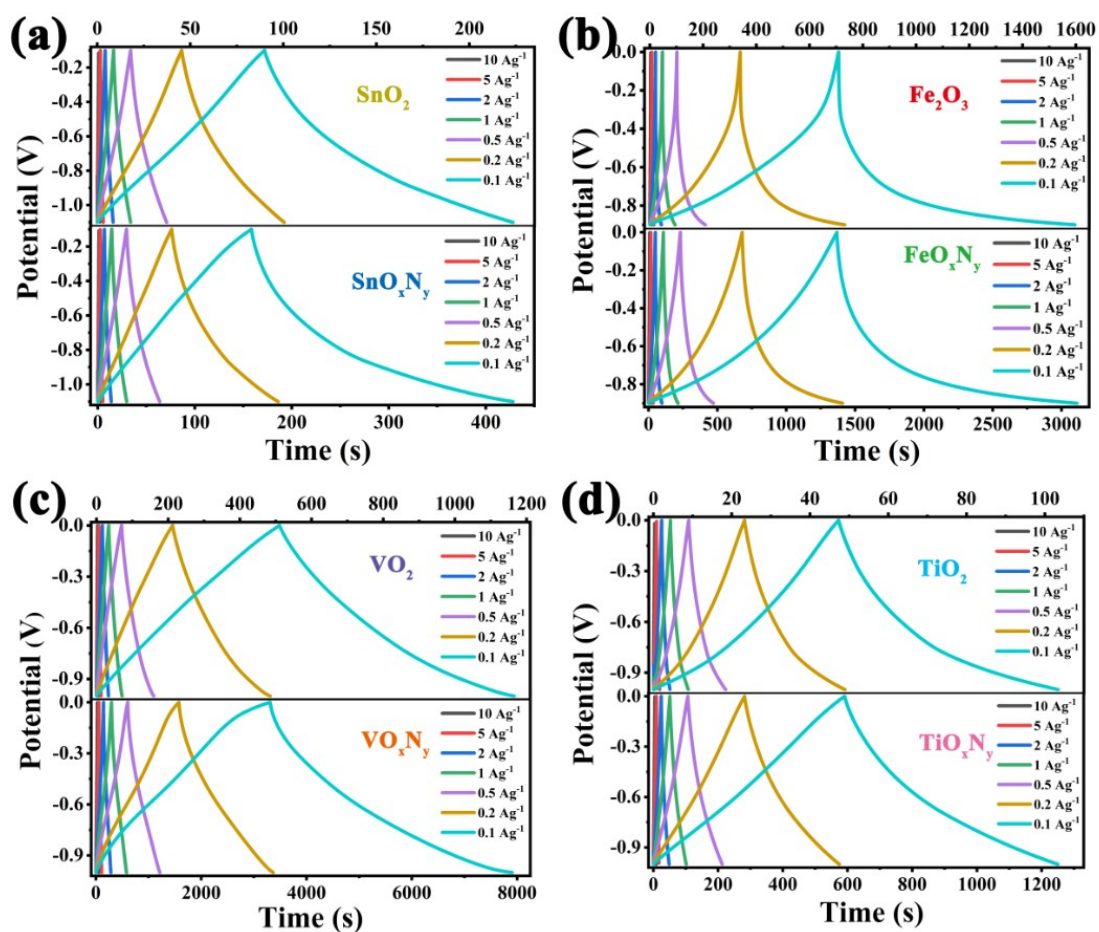

**Figure S9.** The GCD curves at increasing current density of the  $\text{SnO}_2$  and  $\text{SnO}_x\text{N}_y$  (a),  $\text{Fe}_2\text{O}_3$  and  $\text{FeO}_x\text{N}_y$  (b),  $\text{VO}_2$  and  $\text{VO}_x\text{N}_y$  (c),  $\text{TiO}_2$  and  $\text{TiO}_x\text{N}_y$  (d) electrodes.

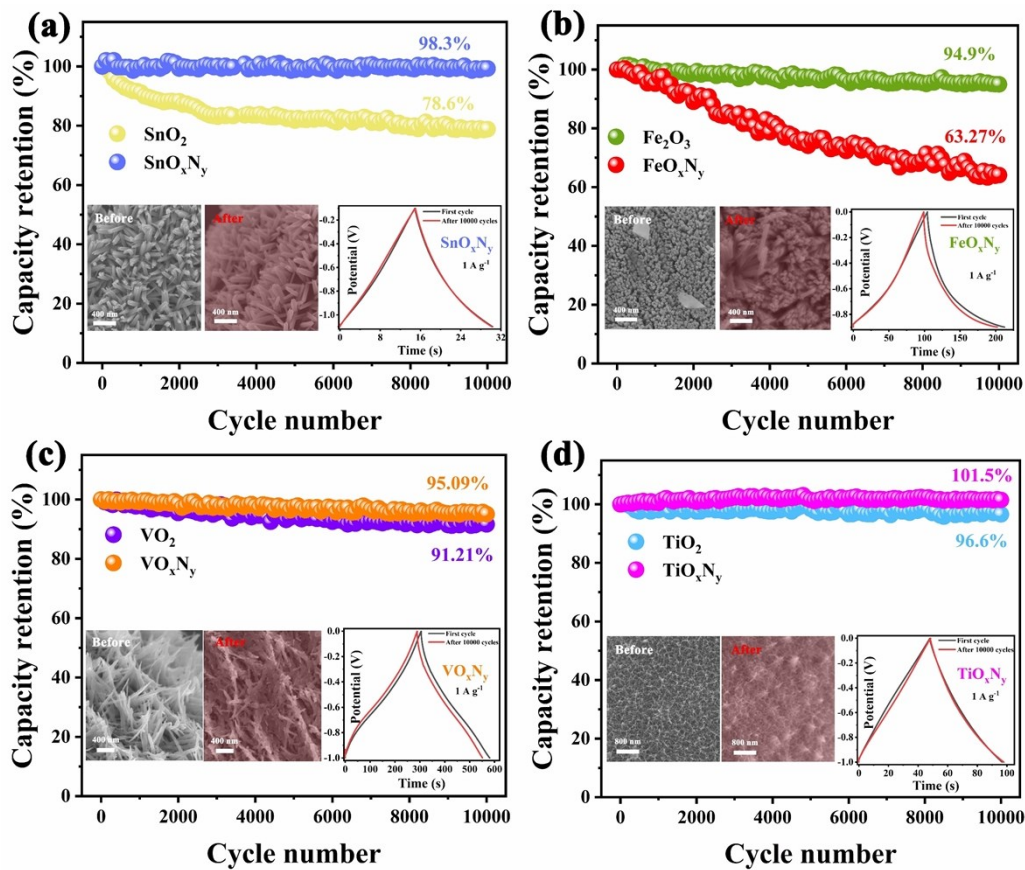

**Figure S10.** Charge/discharge cycling performance of CM electrodes and CMM electrodes, insets figures are SEM images and GCD curves before and after 10000 cycles.

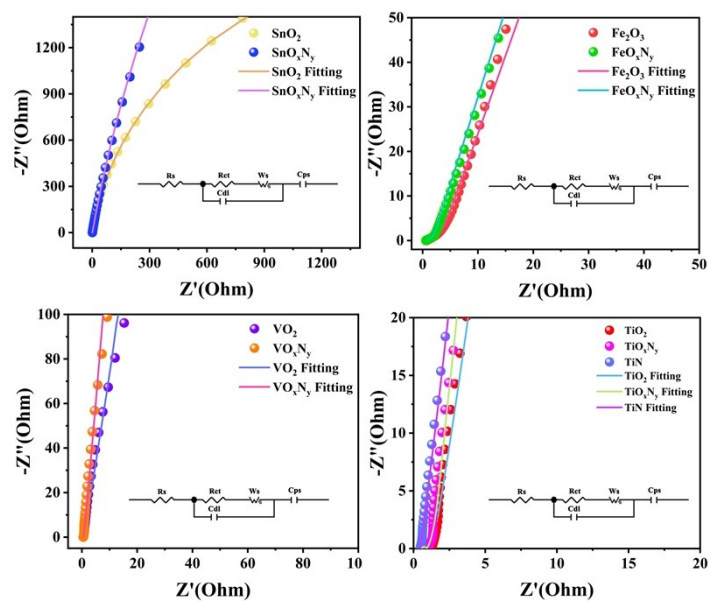

**Figure S11.** Nyquist plots of the electrodes, with inset showing the equivalent circuit model.

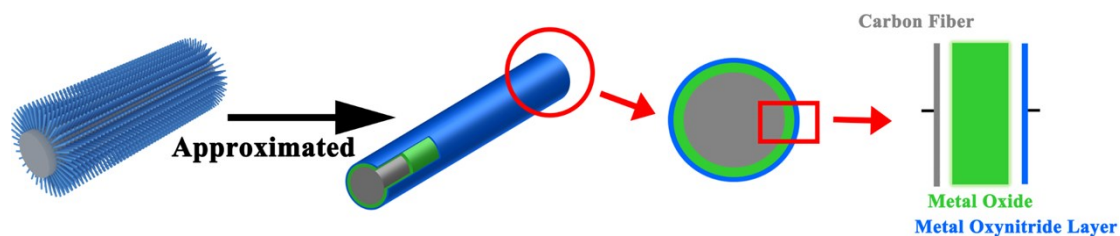

**Figure S12.** Metal oxynitride nanorods on each carbon fiber can be approximated to a coaxial mini parallel-plate capacitor, form a sandwich structure.

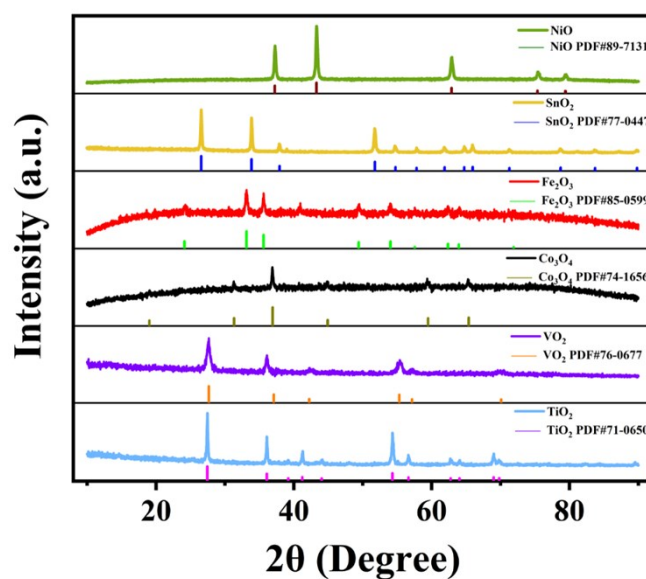

**Figure S13.** XRD patterns of the metal oxides powder.

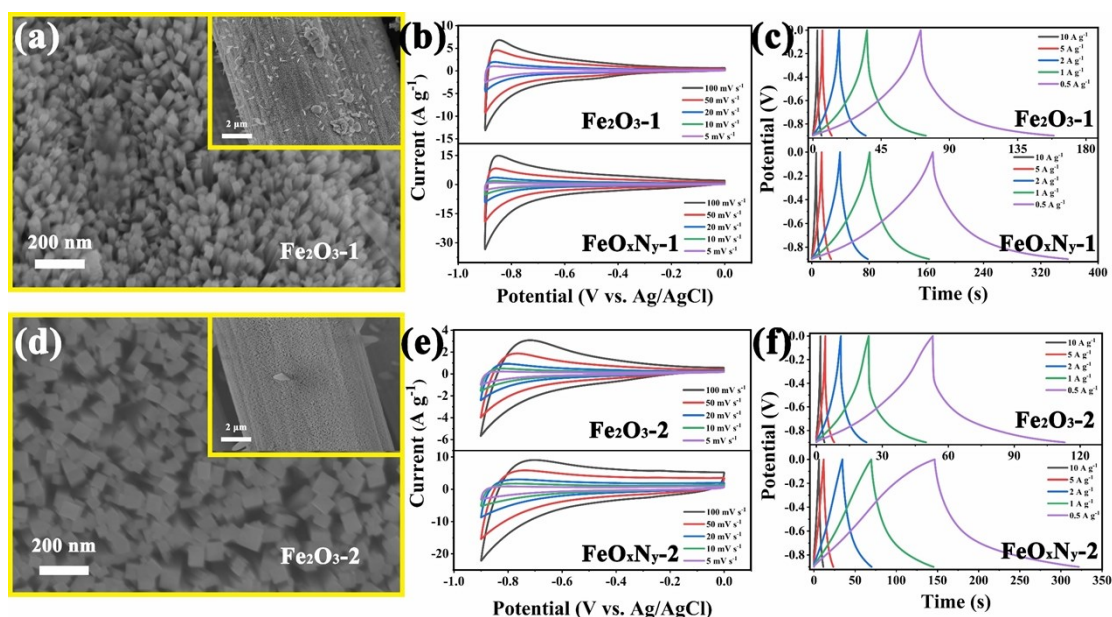

**Figure S14.** (a) SEM images of Fe<sub>2</sub>O<sub>3</sub>-1 (small ‘A’ value); (b) CV curves of Fe<sub>2</sub>O<sub>3</sub>-1 and FeO<sub>x</sub>N<sub>y</sub>-1; (c) GCD curves of Fe<sub>2</sub>O<sub>3</sub>-1 and FeO<sub>x</sub>N<sub>y</sub>-1; (d) SEM images of Fe<sub>2</sub>O<sub>3</sub>-2 (large ‘A’ value); (e) CV curves of Fe<sub>2</sub>O<sub>3</sub>-2 and FeO<sub>x</sub>N<sub>y</sub>-2; (f) GCD curves of Fe<sub>2</sub>O<sub>3</sub>-2 and FeO<sub>x</sub>N<sub>y</sub>-2.

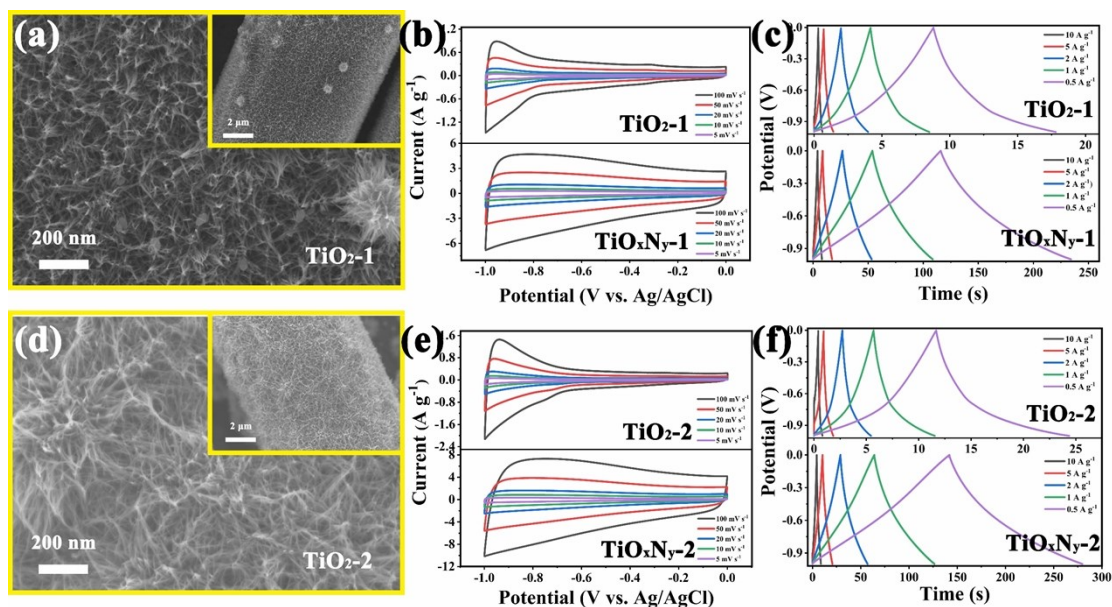

**Figure S15.** (a) SEM images of TiO<sub>2</sub>-1 (small ‘d’ value); (b) CV curves of TiO<sub>2</sub>-1 and TiO<sub>x</sub>N<sub>y</sub>-1; (c) GCD curves of TiO<sub>2</sub>-1 and TiO<sub>x</sub>N<sub>y</sub>-1; (d) SEM images of TiO<sub>2</sub>-2 (large ‘d’ value); (e) CV curves of TiO<sub>2</sub>-2 and TiO<sub>x</sub>N<sub>y</sub>-2; (f) GCD curves of TiO<sub>2</sub>-2 and TiO<sub>x</sub>N<sub>y</sub>-2.

‘d’ value); (e) CV curves of  $\text{TiO}_2$ -2 and  $\text{TiO}_x\text{N}_y$ -2; (f) GCD curves of  $\text{TiO}_2$ -2 and  $\text{TiO}_x\text{N}_y$ -2.

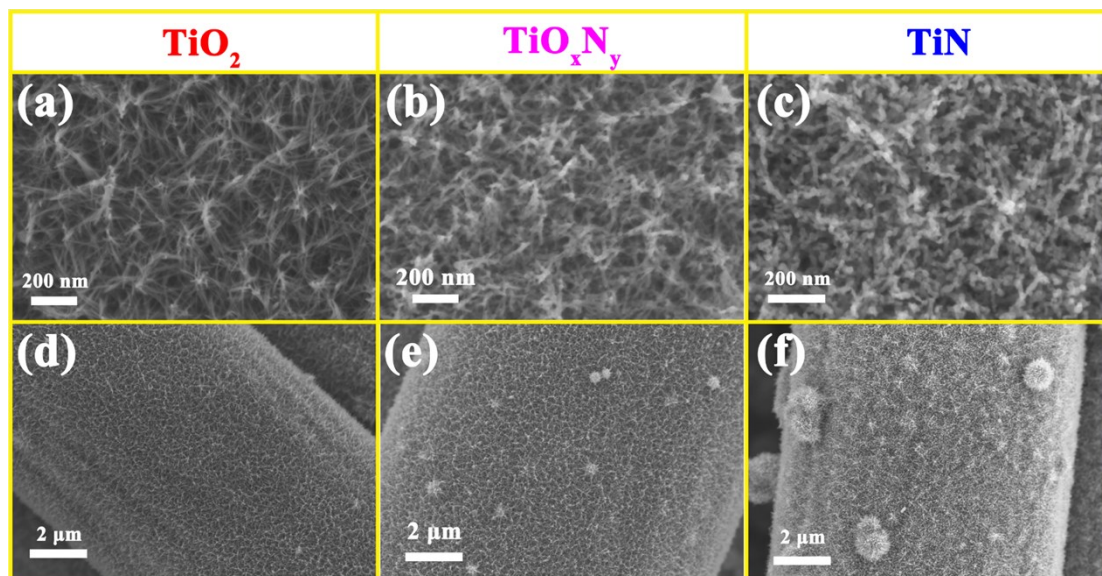

**Figure S16.** SEM images of the corresponding (a, d)  $\text{TiO}_2$ , (b, e)  $\text{TiO}_x\text{N}_y$ , (c, f)  $\text{TiN}$  at different magnification.

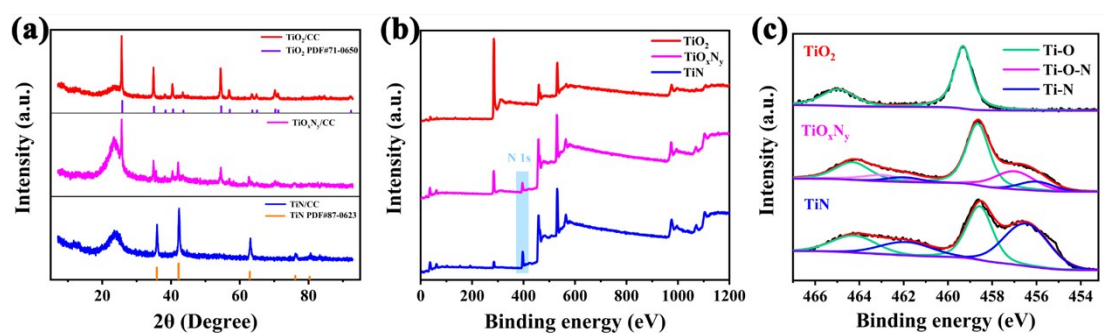

**Figure S17.** XRD patterns and XPS spectra of the  $\text{TiO}_2$ ,  $\text{TiO}_x\text{N}_y$  and  $\text{TiN}$ .

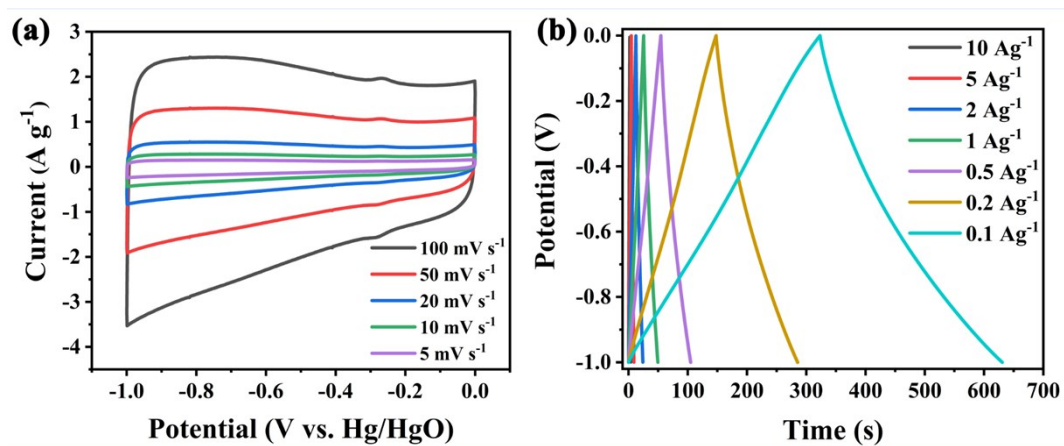

**Figure S18.** The CV and GCD curves at increasing scan rates and current density of the TiN.

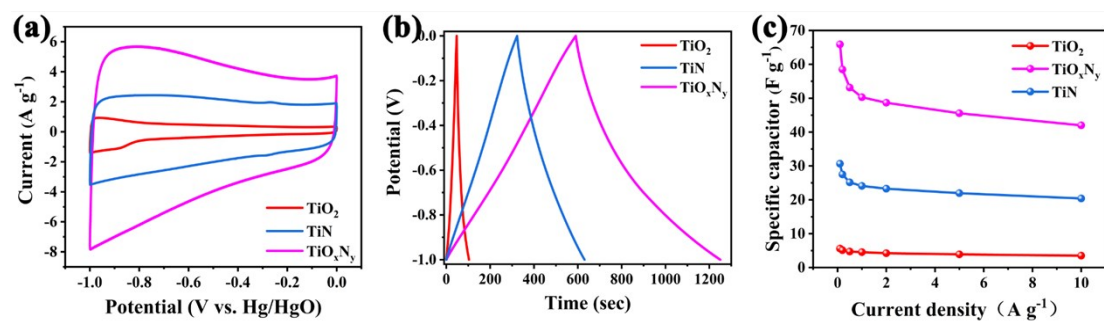

**Figure S19.** The CV, GCD and as a function of current density of the TiO<sub>2</sub>, TiO<sub>x</sub>N<sub>y</sub> and TiN electrodes.

## S6. Supplementary Table S1-S11

**Table S1.** The specific capacity at increasing current density of CM and CMM (M=Sn, Fe, V and Ti) electrodes.

| Current density                 | 0.1 A g <sup>-1</sup> | 0.2 A g <sup>-1</sup> | 0.5 A g <sup>-1</sup> | 1 A g <sup>-1</sup> | 2 A g <sup>-1</sup> | 5 A g <sup>-1</sup> | 10 A g <sup>-1</sup> |
|---------------------------------|-----------------------|-----------------------|-----------------------|---------------------|---------------------|---------------------|----------------------|
| SnO <sub>2</sub>                | 13.35                 | 11.00                 | 9.68                  | 9.13                | 8.54                | 8.00                | 7.40                 |
| SnO <sub>x</sub> N <sub>y</sub> | 26.97                 | 21.96                 | 17.05                 | 15.47               | 13.98               | 12.90               | 12.40                |
| Multiple                        | 2.02                  | 2.00                  | 1.76                  | 1.69                | 1.64                | 1.61                | 1.68                 |
| Fe <sub>2</sub> O <sub>3</sub>  | 98.86                 | 87.12                 | 59.17                 | 52.57               | 47.57               | 41.56               | 37.33                |
| FeO <sub>x</sub> N <sub>y</sub> | 193.34                | 162.08                | 133.31                | 118.11              | 105.33              | 89.89               | 77.22                |
| Multiple                        | 1.96                  | 1.86                  | 2.25                  | 2.24                | 2.21                | 2.16                | 2.07                 |
| VO <sub>2</sub>                 | 68.24                 | 55.08                 | 45.01                 | 39.40               | 36.00               | 34.05               | 33.20                |
| VO <sub>x</sub> N <sub>y</sub>  | 459.72                | 358.14                | 304.29                | 286.56              | 275.66              | 266.41              | 261.68               |
| Multiple                        | 6.73                  | 6.50                  | 6.76                  | 7.27                | 7.66                | 7.82                | 7.88                 |
| TiO <sub>2</sub>                | 5.61                  | 5.134                 | 4.73                  | 4.56                | 4.24                | 3.90                | 3.50                 |
| TiO <sub>x</sub> N <sub>y</sub> | 65.90                 | 58.50                 | 53.15                 | 50.30               | 48.66               | 45.55               | 42.00                |
| Multiple                        | 11.75                 | 11.39                 | 11.25                 | 11.03               | 11.48               | 11.68               | 12.00                |

**Table S2.** Rs and Rct values of CM electrodes and CMM electrodes.

|         | SnO <sub>2</sub> | SnON | Fe <sub>2</sub> O <sub>3</sub> | FeON | VO <sub>2</sub> | VON  | TiO <sub>2</sub> | TiON | TiN   |
|---------|------------------|------|--------------------------------|------|-----------------|------|------------------|------|-------|
| Rs (Ω)  | 0.68             | 0.65 | 0.61                           | 0.58 | 0.51            | 0.49 | 0.61             | 0.59 | 0.44  |
| Rct (Ω) | 0.66             | 0.32 | 0.83                           | 0.45 | 0.52            | 0.23 | 1.06             | 0.29 | 0.026 |

**Table S3.** Resistivity and conductivity of CM electrodes and CMM electrodes.

|                                     | L (cm) | S (cm <sup>2</sup> ) | R (Ω)    | ρ<br>(Ω cm <sup>2</sup> m <sup>-1</sup> ) | σ (S cm <sup>-1</sup> ) |
|-------------------------------------|--------|----------------------|----------|-------------------------------------------|-------------------------|
| Fe <sub>2</sub> O <sub>3</sub> /CF  | 1.51   | 0.01768              | 1025.307 | 0.120049                                  | 8.329915                |
| FeO <sub>x</sub> N <sub>y</sub> /CF | 1.506  | 0.01855              | 358.3033 | 0.044134                                  | 22.65845                |
| SnO <sub>2</sub> /CF                | 1.512  | 0.01584              | 929.7187 | 0.097399                                  | 10.26704                |

|                                        |       |         |          |          |          |
|----------------------------------------|-------|---------|----------|----------|----------|
| <b>SnO<sub>x</sub>N<sub>y</sub>/CF</b> | 1.511 | 0.01734 | 523.343  | 0.060058 | 16.65056 |
| <b>VO<sub>2</sub>/CF</b>               | 1.498 | 0.01716 | 1040.405 | 0.119181 | 8.390579 |
| <b>VO<sub>x</sub>N<sub>y</sub>/CF</b>  | 1.495 | 0.01656 | 875.3968 | 0.096967 | 10.31278 |
| <b>TiO<sub>2</sub>/CF</b>              | 1.502 | 0.0189  | 1131.838 | 0.142422 | 7.021401 |
| <b>TiO<sub>x</sub>N<sub>y</sub>/CF</b> | 1.505 | 0.01925 | 247.5031 | 0.031657 | 31.58822 |

**able S4.** Dielectric constant and dielectric loss of NiO.

| Frequency | D (mU) | Cp (pF) | d (mm) | A (mm <sup>2</sup> ) | $\epsilon_0$           | $\epsilon_r$ |
|-----------|--------|---------|--------|----------------------|------------------------|--------------|
| 1K Hz     | 420    | 0.255   | 1.37   | 1.37                 | 8.85*10 <sup>-12</sup> | 28.814       |
| 2K Hz     | 320    | 0.232   | 1.37   | 1.37                 | 8.85*10 <sup>-12</sup> | 26.215       |
| 5K Hz     | 290    | 0.213   | 1.37   | 1.37                 | 8.85*10 <sup>-12</sup> | 24.068       |
| 10K Hz    | 288    | 0.2     | 1.37   | 1.37                 | 8.85*10 <sup>-12</sup> | 22.599       |
| 20K Hz    | 248    | 0.182   | 1.37   | 1.37                 | 8.85*10 <sup>-12</sup> | 20.565       |
| 50K Hz    | 171    | 0.167   | 1.37   | 1.37                 | 8.85*10 <sup>-12</sup> | 18.870       |
| 100K Hz   | 133    | 0.154   | 1.37   | 1.37                 | 8.85*10 <sup>-12</sup> | 17.401       |
| 200K Hz   | 125    | 0.143   | 1.37   | 1.37                 | 8.85*10 <sup>-12</sup> | 16.158       |
| 500K Hz   | 141    | 0.133   | 1.37   | 1.37                 | 8.85*10 <sup>-12</sup> | 15.028       |
| 1M Hz     | 174    | 0.125   | 1.37   | 1.37                 | 8.85*10 <sup>-12</sup> | 14.124       |
| 2M Hz     | 206    | 0.12    | 1.37   | 1.37                 | 8.85*10 <sup>-12</sup> | 13.559       |
| 5M Hz     | 233    | 0.113   | 1.37   | 1.37                 | 8.85*10 <sup>-12</sup> | 12.768       |
| 10M Hz    | 235    | 0.107   | 1.37   | 1.37                 | 8.85*10 <sup>-12</sup> | 12.090       |
| 20M Hz    | 226    | 0.101   | 1.37   | 1.37                 | 8.85*10 <sup>-12</sup> | 11.412       |
| 50M Hz    | 200    | 0.097   | 1.37   | 1.37                 | 8.85*10 <sup>-12</sup> | 10.960       |
| 80M Hz    | 185    | 0.093   | 1.37   | 1.37                 | 8.85*10 <sup>-12</sup> | 10.508       |

**Table S5.** Dielectric constant and dielectric loss of SnO<sub>2</sub>.

| Frequency | D (mU) | Cp (pF) | d (mm) | A (mm <sup>2</sup> ) | $\epsilon_0$           | $\epsilon_r$ |
|-----------|--------|---------|--------|----------------------|------------------------|--------------|
| 1K Hz     | 257    | 0.511   | 0.85   | 1.37                 | 8.85*10 <sup>-12</sup> | 35.824       |
| 2K Hz     | 238    | 0.475   | 0.85   | 1.37                 | 8.85*10 <sup>-12</sup> | 33.300       |
| 5K Hz     | 214    | 0.437   | 0.85   | 1.37                 | 8.85*10 <sup>-12</sup> | 30.636       |
| 10K Hz    | 201    | 0.417   | 0.85   | 1.37                 | 8.85*10 <sup>-12</sup> | 29.234       |
| 20K Hz    | 188    | 0.383   | 0.85   | 1.37                 | 8.85*10 <sup>-12</sup> | 26.851       |
| 50K Hz    | 145    | 0.352   | 0.85   | 1.37                 | 8.85*10 <sup>-12</sup> | 24.677       |
| 100K Hz   | 122    | 0.316   | 0.85   | 1.37                 | 8.85*10 <sup>-12</sup> | 22.153       |
| 200K Hz   | 119    | 0.289   | 0.85   | 1.37                 | 8.85*10 <sup>-12</sup> | 20.261       |
| 500K Hz   | 120    | 0.275   | 0.85   | 1.37                 | 8.85*10 <sup>-12</sup> | 19.279       |
| 1M Hz     | 128    | 0.251   | 0.85   | 1.37                 | 8.85*10 <sup>-12</sup> | 17.597       |

|        |     |       |      |      |                        |        |
|--------|-----|-------|------|------|------------------------|--------|
| 2M Hz  | 133 | 0.24  | 0.85 | 1.37 | $8.85 \times 10^{-12}$ | 16.825 |
| 5M Hz  | 163 | 0.222 | 0.85 | 1.37 | $8.85 \times 10^{-12}$ | 15.564 |
| 10M Hz | 182 | 0.207 | 0.85 | 1.37 | $8.85 \times 10^{-12}$ | 14.512 |
| 20M Hz | 206 | 0.194 | 0.85 | 1.37 | $8.85 \times 10^{-12}$ | 13.601 |
| 50M Hz | 180 | 0.183 | 0.85 | 1.37 | $8.85 \times 10^{-12}$ | 12.829 |
| 80M Hz | 162 | 0.18  | 0.85 | 1.37 | $8.85 \times 10^{-12}$ | 12.619 |

**Table S6.** Dielectric constant and dielectric loss of  $\text{Fe}_2\text{O}_3$ .

| Frequency | D (mU) | Cp (pF) | d (mm) | A (mm <sup>2</sup> ) | $\epsilon_0$           | $\epsilon_r$ |
|-----------|--------|---------|--------|----------------------|------------------------|--------------|
| 1K Hz     | 208    | 0.438   | 1.27   | 1.37                 | $8.85 \times 10^{-12}$ | 45.879       |
| 2K Hz     | 179    | 0.404   | 1.27   | 1.37                 | $8.85 \times 10^{-12}$ | 42.318       |
| 5K Hz     | 158    | 0.37    | 1.27   | 1.37                 | $8.85 \times 10^{-12}$ | 38.756       |
| 10K Hz    | 140    | 0.336   | 1.27   | 1.37                 | $8.85 \times 10^{-12}$ | 35.195       |
| 20K Hz    | 130    | 0.306   | 1.27   | 1.37                 | $8.85 \times 10^{-12}$ | 32.052       |
| 50K Hz    | 148    | 0.276   | 1.27   | 1.37                 | $8.85 \times 10^{-12}$ | 28.910       |
| 100K Hz   | 132    | 0.246   | 1.27   | 1.37                 | $8.85 \times 10^{-12}$ | 25.768       |
| 200K Hz   | 122    | 0.226   | 1.27   | 1.37                 | $8.85 \times 10^{-12}$ | 23.673       |
| 500K Hz   | 116    | 0.205   | 1.27   | 1.37                 | $8.85 \times 10^{-12}$ | 21.473       |
| 1M Hz     | 112    | 0.185   | 1.27   | 1.37                 | $8.85 \times 10^{-12}$ | 19.378       |
| 2M Hz     | 123    | 0.175   | 1.27   | 1.37                 | $8.85 \times 10^{-12}$ | 18.331       |
| 5M Hz     | 133    | 0.164   | 1.27   | 1.37                 | $8.85 \times 10^{-12}$ | 17.178       |
| 10M Hz    | 142    | 0.163   | 1.27   | 1.37                 | $8.85 \times 10^{-12}$ | 17.074       |
| 20M Hz    | 135    | 0.153   | 1.27   | 1.37                 | $8.85 \times 10^{-12}$ | 16.026       |
| 50M Hz    | 130    | 0.146   | 1.27   | 1.37                 | $8.85 \times 10^{-12}$ | 15.293       |
| 80M Hz    | 127    | 0.138   | 1.27   | 1.37                 | $8.85 \times 10^{-12}$ | 14.455       |

**Table S7.** Dielectric constant and dielectric loss of  $\text{Co}_3\text{O}_4$ .

| Frequency | D (mU) | Cp (pF) | d (mm) | A (mm <sup>2</sup> ) | $\epsilon_0$           | $\epsilon_r$ |
|-----------|--------|---------|--------|----------------------|------------------------|--------------|
| 1K Hz     | 186    | 0.898   | 0.85   | 1.37                 | $8.85 \times 10^{-12}$ | 62.955       |
| 2K Hz     | 170    | 0.781   | 0.85   | 1.37                 | $8.85 \times 10^{-12}$ | 54.753       |
| 5K Hz     | 132    | 0.693   | 0.85   | 1.37                 | $8.85 \times 10^{-12}$ | 48.583       |
| 10K Hz    | 103    | 0.623   | 0.85   | 1.37                 | $8.85 \times 10^{-12}$ | 43.676       |
| 20K Hz    | 85     | 0.56    | 0.85   | 1.37                 | $8.85 \times 10^{-12}$ | 39.259       |
| 50K Hz    | 73     | 0.519   | 0.85   | 1.37                 | $8.85 \times 10^{-12}$ | 36.385       |
| 100K Hz   | 62     | 0.475   | 0.85   | 1.37                 | $8.85 \times 10^{-12}$ | 33.300       |
| 200K Hz   | 53     | 0.437   | 0.85   | 1.37                 | $8.85 \times 10^{-12}$ | 30.636       |
| 500K Hz   | 48     | 0.411   | 0.85   | 1.37                 | $8.85 \times 10^{-12}$ | 28.814       |

|        |    |       |      |      |                        |        |
|--------|----|-------|------|------|------------------------|--------|
| 1M Hz  | 58 | 0.376 | 0.85 | 1.37 | $8.85 \times 10^{-12}$ | 26.360 |
| 2M Hz  | 60 | 0.357 | 0.85 | 1.37 | $8.85 \times 10^{-12}$ | 25.028 |
| 5M Hz  | 71 | 0.354 | 0.85 | 1.37 | $8.85 \times 10^{-12}$ | 24.818 |
| 10M Hz | 75 | 0.34  | 0.85 | 1.37 | $8.85 \times 10^{-12}$ | 23.836 |
| 20M Hz | 62 | 0.326 | 0.85 | 1.37 | $8.85 \times 10^{-12}$ | 22.855 |
| 50M Hz | 58 | 0.317 | 0.85 | 1.37 | $8.85 \times 10^{-12}$ | 22.224 |
| 80M Hz | 55 | 0.314 | 0.85 | 1.37 | $8.85 \times 10^{-12}$ | 22.013 |

**Table S8.** Dielectric constant and dielectric loss of VO<sub>2</sub>.

| Frequency | D (mU) | Cp (pF) | d (mm) | A (mm <sup>2</sup> ) | $\epsilon_0$           | $\epsilon_r$ |
|-----------|--------|---------|--------|----------------------|------------------------|--------------|
| 1K Hz     | 102    | 1.692   | 0.75   | 1.37                 | $8.85 \times 10^{-12}$ | 104.6641     |
| 2K Hz     | 83     | 1.469   | 0.75   | 1.37                 | $8.85 \times 10^{-12}$ | 90.86973     |
| 5K Hz     | 70     | 1.307   | 0.75   | 1.37                 | $8.85 \times 10^{-12}$ | 80.84869     |
| 10K Hz    | 62     | 1.2     | 0.75   | 1.37                 | $8.85 \times 10^{-12}$ | 74.22987     |
| 20K Hz    | 57     | 1.138   | 0.75   | 1.37                 | $8.85 \times 10^{-12}$ | 70.39466     |
| 50K Hz    | 52     | 1.084   | 0.75   | 1.37                 | $8.85 \times 10^{-12}$ | 67.05431     |
| 100K Hz   | 48     | 1.035   | 0.75   | 1.37                 | $8.85 \times 10^{-12}$ | 64.02326     |
| 200K Hz   | 42     | 0.992   | 0.75   | 1.37                 | $8.85 \times 10^{-12}$ | 61.36336     |
| 500K Hz   | 43     | 0.958   | 0.75   | 1.37                 | $8.85 \times 10^{-12}$ | 59.26018     |
| 1M Hz     | 48     | 0.93    | 0.75   | 1.37                 | $8.85 \times 10^{-12}$ | 57.52815     |
| 2M Hz     | 50     | 0.907   | 0.75   | 1.37                 | $8.85 \times 10^{-12}$ | 56.10541     |
| 5M Hz     | 62     | 0.887   | 0.75   | 1.37                 | $8.85 \times 10^{-12}$ | 54.86824     |
| 10M Hz    | 75     | 0.864   | 0.75   | 1.37                 | $8.85 \times 10^{-12}$ | 53.4455      |
| 20M Hz    | 86     | 0.855   | 0.75   | 1.37                 | $8.85 \times 10^{-12}$ | 52.88878     |
| 50M Hz    | 73     | 0.84    | 0.75   | 1.37                 | $8.85 \times 10^{-12}$ | 51.96091     |
| 80M Hz    | 68     | 0.824   | 0.75   | 1.37                 | $8.85 \times 10^{-12}$ | 50.97117     |

**Table S9.** Dielectric constant and dielectric loss of TiO<sub>2</sub>.

| Frequency | D (mU) | Cp (pF) | d (mm) | A (mm <sup>2</sup> ) | $\epsilon_0$           | $\epsilon_r$ |
|-----------|--------|---------|--------|----------------------|------------------------|--------------|
| 1K Hz     | 88     | 1.486   | 1.06   | 1.37                 | $8.85 \times 10^{-12}$ | 129.915      |
| 2K Hz     | 72     | 1.356   | 1.06   | 1.37                 | $8.85 \times 10^{-12}$ | 118.550      |
| 5K Hz     | 64     | 1.242   | 1.06   | 1.37                 | $8.85 \times 10^{-12}$ | 108.583      |
| 10K Hz    | 51     | 1.137   | 1.06   | 1.37                 | $8.85 \times 10^{-12}$ | 99.404       |
| 20K Hz    | 42     | 1.05    | 1.06   | 1.37                 | $8.85 \times 10^{-12}$ | 91.798       |
| 50K Hz    | 36     | 0.982   | 1.06   | 1.37                 | $8.85 \times 10^{-12}$ | 85.853       |
| 100K Hz   | 32     | 0.92    | 1.06   | 1.37                 | $8.85 \times 10^{-12}$ | 80.432       |
| 200K Hz   | 28     | 0.877   | 1.06   | 1.37                 | $8.85 \times 10^{-12}$ | 76.673       |

|         |    |       |      |      |                        |        |
|---------|----|-------|------|------|------------------------|--------|
| 500K Hz | 36 | 0.835 | 1.06 | 1.37 | $8.85 \times 10^{-12}$ | 73.001 |
| 1M Hz   | 45 | 0.811 | 1.06 | 1.37 | $8.85 \times 10^{-12}$ | 70.903 |
| 2M Hz   | 53 | 0.782 | 1.06 | 1.37 | $8.85 \times 10^{-12}$ | 68.367 |
| 5M Hz   | 60 | 0.759 | 1.06 | 1.37 | $8.85 \times 10^{-12}$ | 66.357 |
| 10M Hz  | 64 | 0.737 | 1.06 | 1.37 | $8.85 \times 10^{-12}$ | 64.433 |
| 20M Hz  | 75 | 0.718 | 1.06 | 1.37 | $8.85 \times 10^{-12}$ | 62.772 |
| 50M Hz  | 61 | 0.7   | 1.06 | 1.37 | $8.85 \times 10^{-12}$ | 61.198 |
| 80M Hz  | 55 | 0.687 | 1.06 | 1.37 | $8.85 \times 10^{-12}$ | 60.062 |

**Table S10.** The specific capacitance at increasing current density of Fe<sub>2</sub>O<sub>3</sub> and FeO<sub>x</sub>N<sub>y</sub> electrodes with different ‘A’ values.

| Current density                    | 0.5 A g <sup>-1</sup> | 1 A g <sup>-1</sup> | 2 A g <sup>-1</sup> | 5 A g <sup>-1</sup> | 10 A g <sup>-1</sup> |
|------------------------------------|-----------------------|---------------------|---------------------|---------------------|----------------------|
| Fe <sub>2</sub> O <sub>3</sub> -1  | 48.73                 | 43.07               | 38.96               | 34.02               | 30.65                |
| FeO <sub>x</sub> N <sub>y</sub> -1 | 104.89                | 92.17               | 86.08               | 72.99               | 64.73                |
| Multiple                           | 2.15                  | 2.14                | 2.21                | 2.15                | 2.11                 |
| Fe <sub>2</sub> O <sub>3</sub> -2  | 33.32                 | 28.99               | 25.88               | 22.48               | 20.09                |
| FeO <sub>x</sub> N <sub>y</sub> -2 | 97.3                  | 84.04               | 79.03               | 64.66               | 58.06                |
| Multiple                           | 2.92                  | 2.90                | 3.05                | 2.88                | 2.89                 |

**Table S11.** The specific capacitance at increasing current density of TiO<sub>2</sub> and TiO<sub>x</sub>N<sub>y</sub> electrodes with different ‘d’ values.

| Current density                    | 0.5 A g <sup>-1</sup> | 1 A g <sup>-1</sup> | 2 A g <sup>-1</sup> | 5 A g <sup>-1</sup> | 10 A g <sup>-1</sup> |
|------------------------------------|-----------------------|---------------------|---------------------|---------------------|----------------------|
| TiO <sub>2</sub> -1                | 4.50                  | 4.33                | 4.00                | 3.55                | 3.10                 |
| TiO <sub>x</sub> N <sub>y</sub> -1 | 59.12                 | 54.79               | 53.15               | 42.90               | 39.80                |
| Multiple                           | 13.13                 | 12.65               | 13.29               | 12.08               | 13.84                |
| TiO <sub>2</sub> -2                | 6.35                  | 5.84                | 5.47                | 4.58                | 4.00                 |
| TiO <sub>x</sub> N <sub>y</sub> -2 | 68.87                 | 62.29               | 56.03               | 50.93               | 43.13                |
| Multiple                           | 10.85                 | 10.67               | 10.24               | 11.12               | 10.78                |
